# Supplementary material
Source: PubMed Central journal article supplement (PMC8026751)
Supplement: NIHMS1678614-supplement-2.pdf [file NIHMS1678614-supplement-2.pdf]

**Fig S1.**

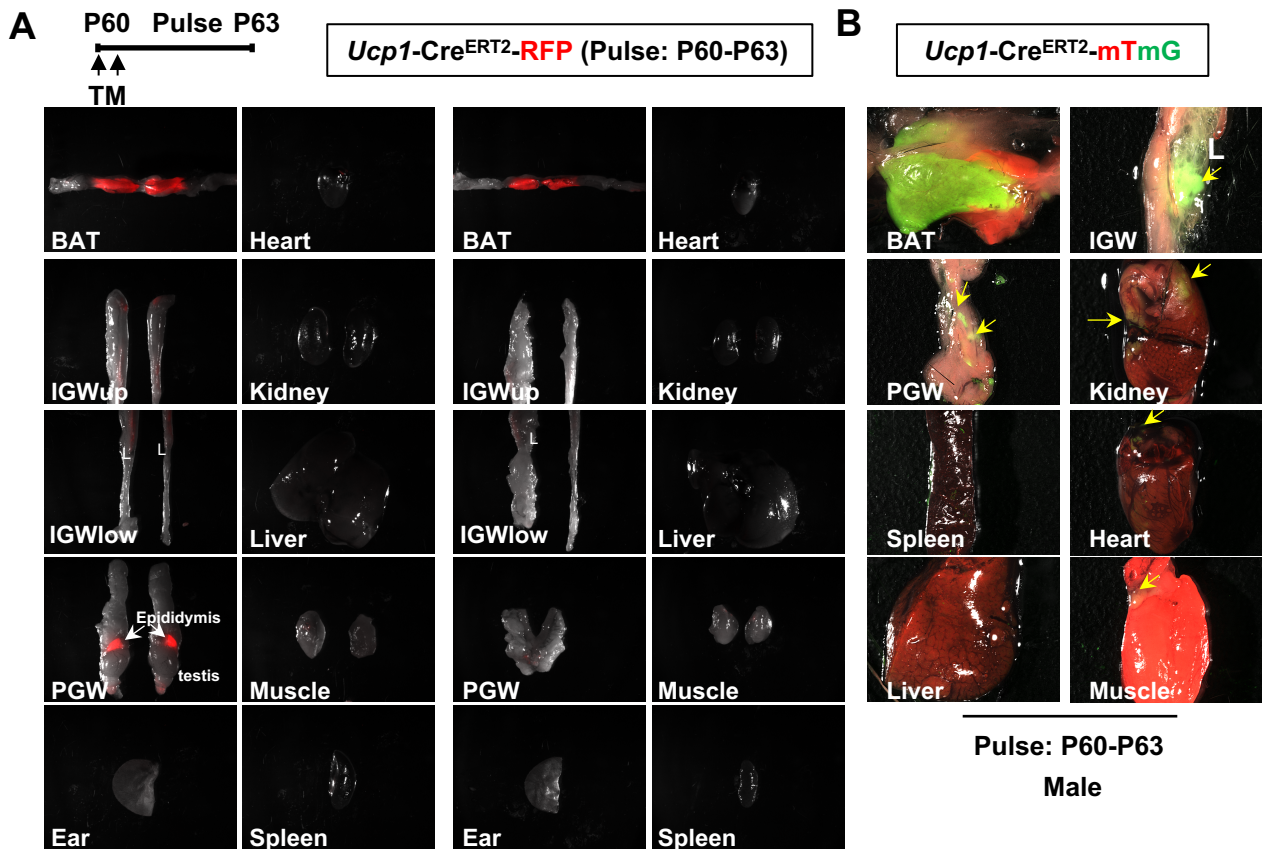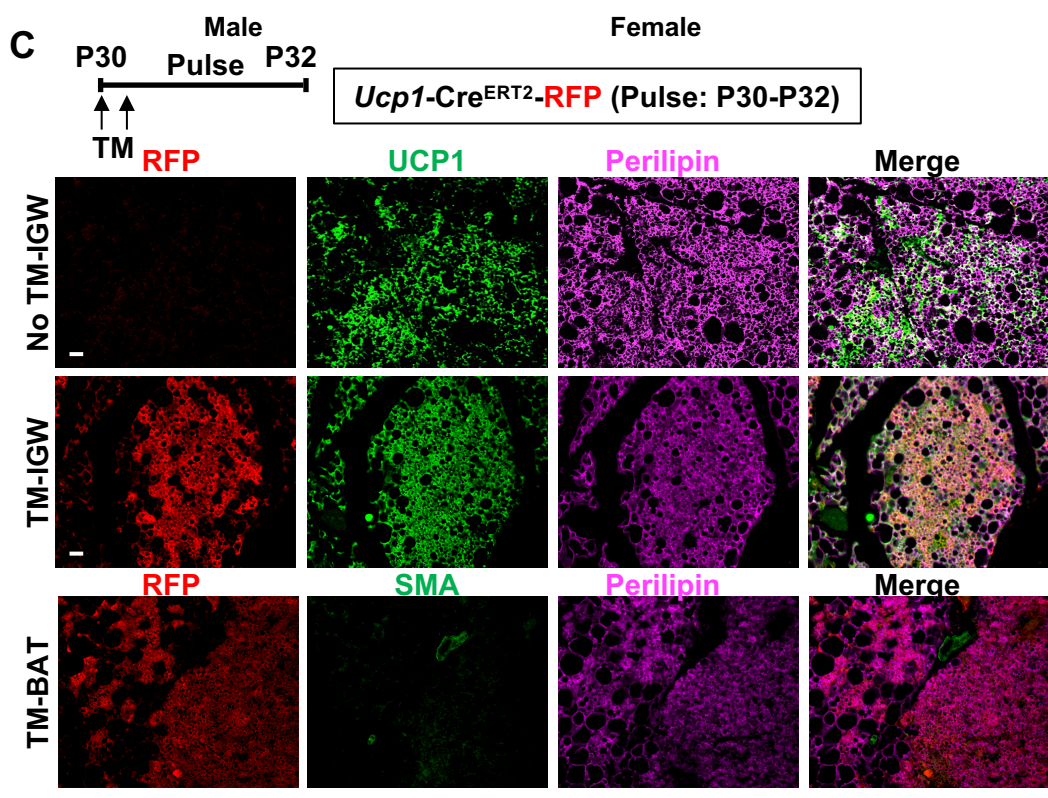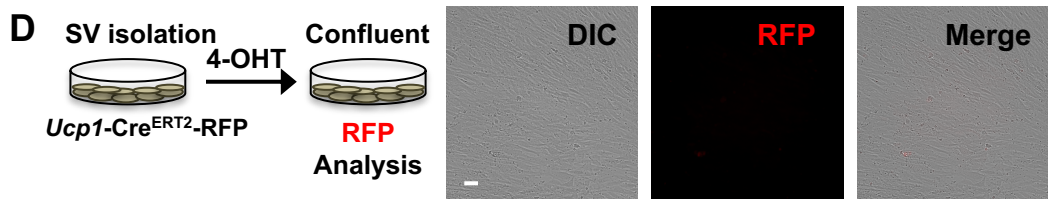

**Figure S1. *Ucp1-Cre<sup>ERT2</sup>*; *Rosa26R-RFP* faithfully labels UCP1+ cells at pulse, Related to Figure 1.**

(A) Whole tissues were imaged for direct RFP. Two-month-old (P60) *Ucp1-Cre<sup>ERT2</sup>*; *Rosa26R-RFP* (UCP1-RFP) male and female mice were administered TM for two doses and were analyzed at P63 (n=4 mice per group). White arrows indicate the Epididymis.

(B) Whole tissues were imaged for direct RFP and GFP. Two-month-old (P60) *Ucp1-Cre<sup>ERT2</sup>*; *Rosa26R-mTmG* (UCP1-mTmG) male mice were administered TM for two doses and were analyzed at P63 (n=4 mice per group). Yellow arrows indicate brown/beige adipose tissue within WAT (IGW and PGW) and other organs, including kidney, heart, muscle.

(C) One-month-old (P30) *Ucp1-Cre<sup>ERT2</sup>*; *Rosa26R-RFP* (UCP1-RFP) male mice were administered TM for two doses and were analyzed at P32 (n=4 mice per group). Representative immunostaining for UCP1-RFP (red), UCP1 (green), and Perilipin (magenta) on IGW and BAT sections of mice with or without TM (tamoxifen). Scale = 100  $\mu$ m.

(D) SV cells isolated from UCP1-RFP mice (n=3 mice per group) were treated with 4-OH-Tamoxifen. Scale = 100  $\mu$ m.

Fig S2.

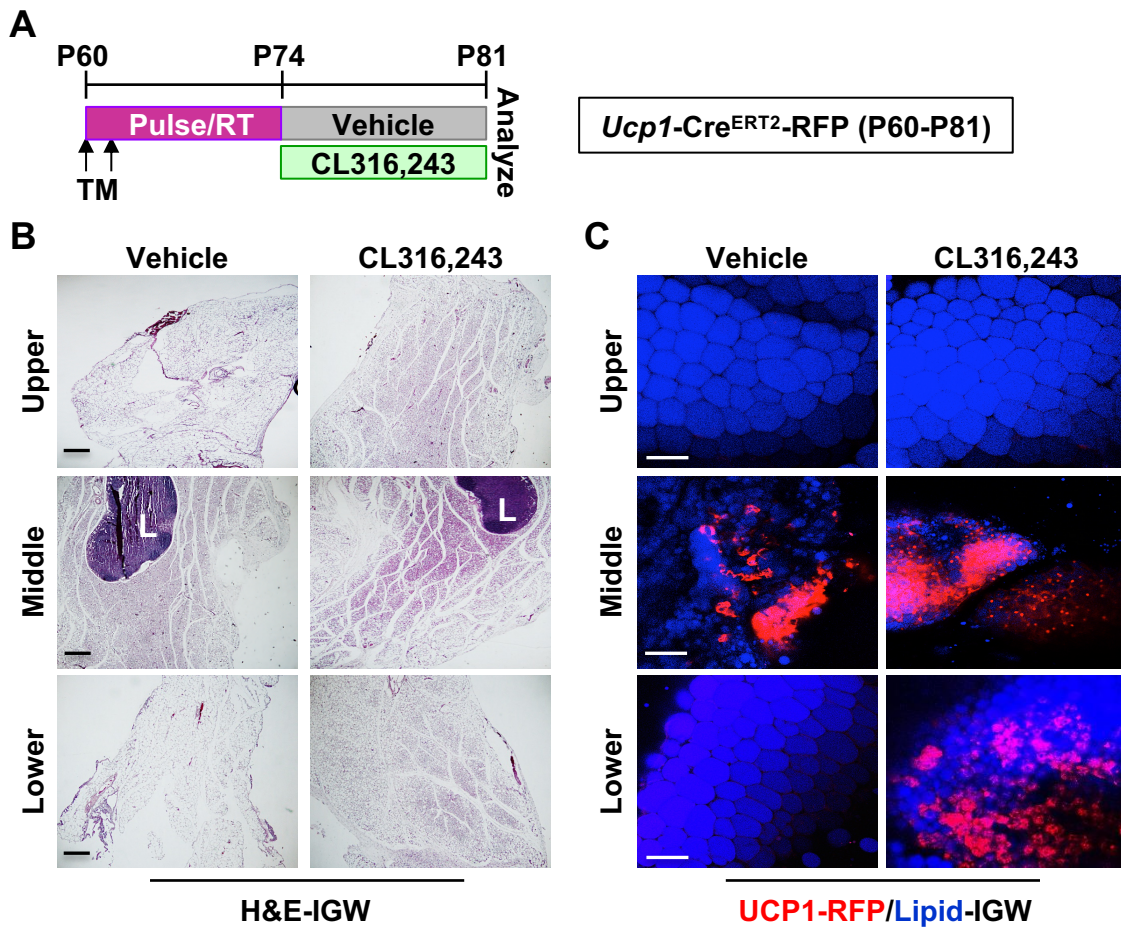

**Figure S2. Pre-existing UCP1+ cells generate new beige adipocytes in response to  $\beta$ 3-adrenergic stimulation, Related to Figure 1.**

(A) Experimental procedure. TM-induced 2-month-old UCP1-RFP male mice were administered vehicle or CL316,243 ( $\beta$ 3 agonist) for 7 consecutive days. (n=5 mice per group)

(B) H&E staining on IGW sections of mice described in (A). IGW depots were separated into 3 portions: upper, middle, and lower. L: lymph node. Scale = 20  $\mu$ m.

(C) Whole IGW depots of mice described in (A) were imaged for direct UCP1-RFP (red) and LipidTox staining (blue). Scale = 200  $\mu$ m.

Fig S3.

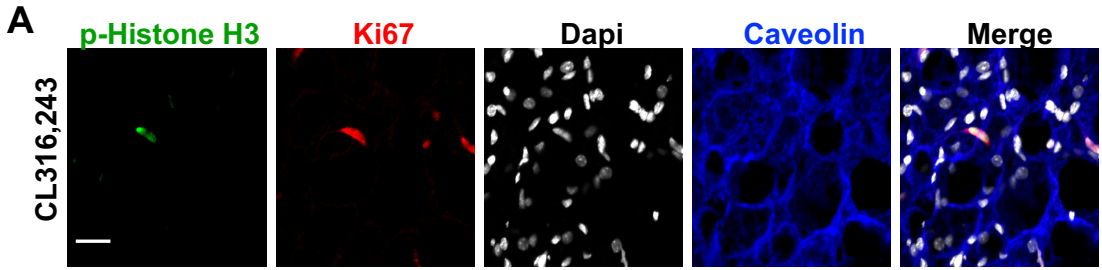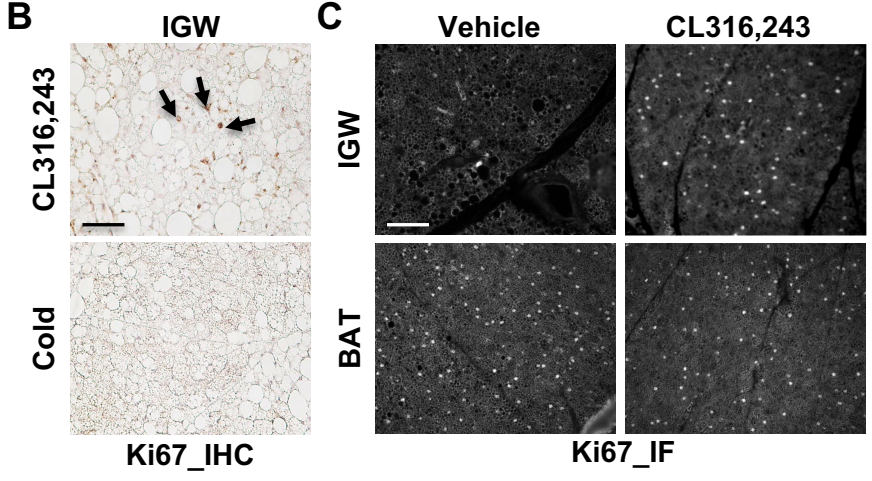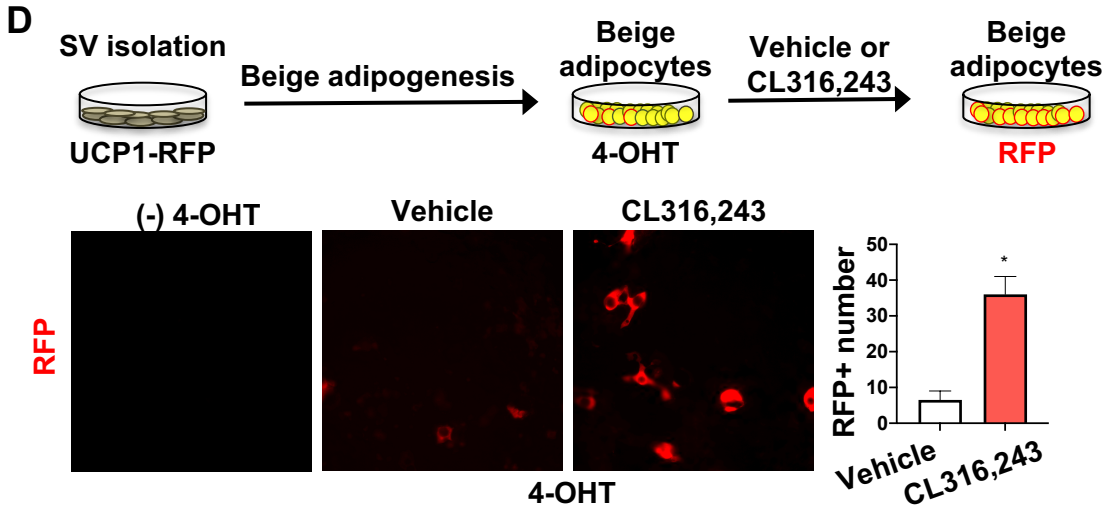

**Figure S3. A subset of UCP1+ beige adipocytes mimic progenitor-like characteristics in response to  $\beta$ 3-agonist, Related to Figure 2.**

(A) Representative fluorescence imaging of p-Histone H3 (green), Ki67 (red) and Caveolin (blue) immunostaining on IGW sections with CL316,243 for 7 days. DAPI stained the nuclei. Scale = 100  $\mu$ m.

(B) Representative IHC of Ki67 staining on IGW sections from mice treated with CL316,243 or cold for 7 days. Arrows showed Ki67+ cells Scale = 200  $\mu$ m.

(C) Representative fluorescence imaging of Ki67 (white) on IGW and BAT sections. Scale = 200  $\mu$ m.

(D) SV cells isolated from IGW of UCP1-RFP mice were differentiated into beige adipocytes *in vitro* and treated with vehicle or CL316,243. Scale = 100  $\mu$ m. \*P<0.01. (n=4 mice per group).

Fig S4.

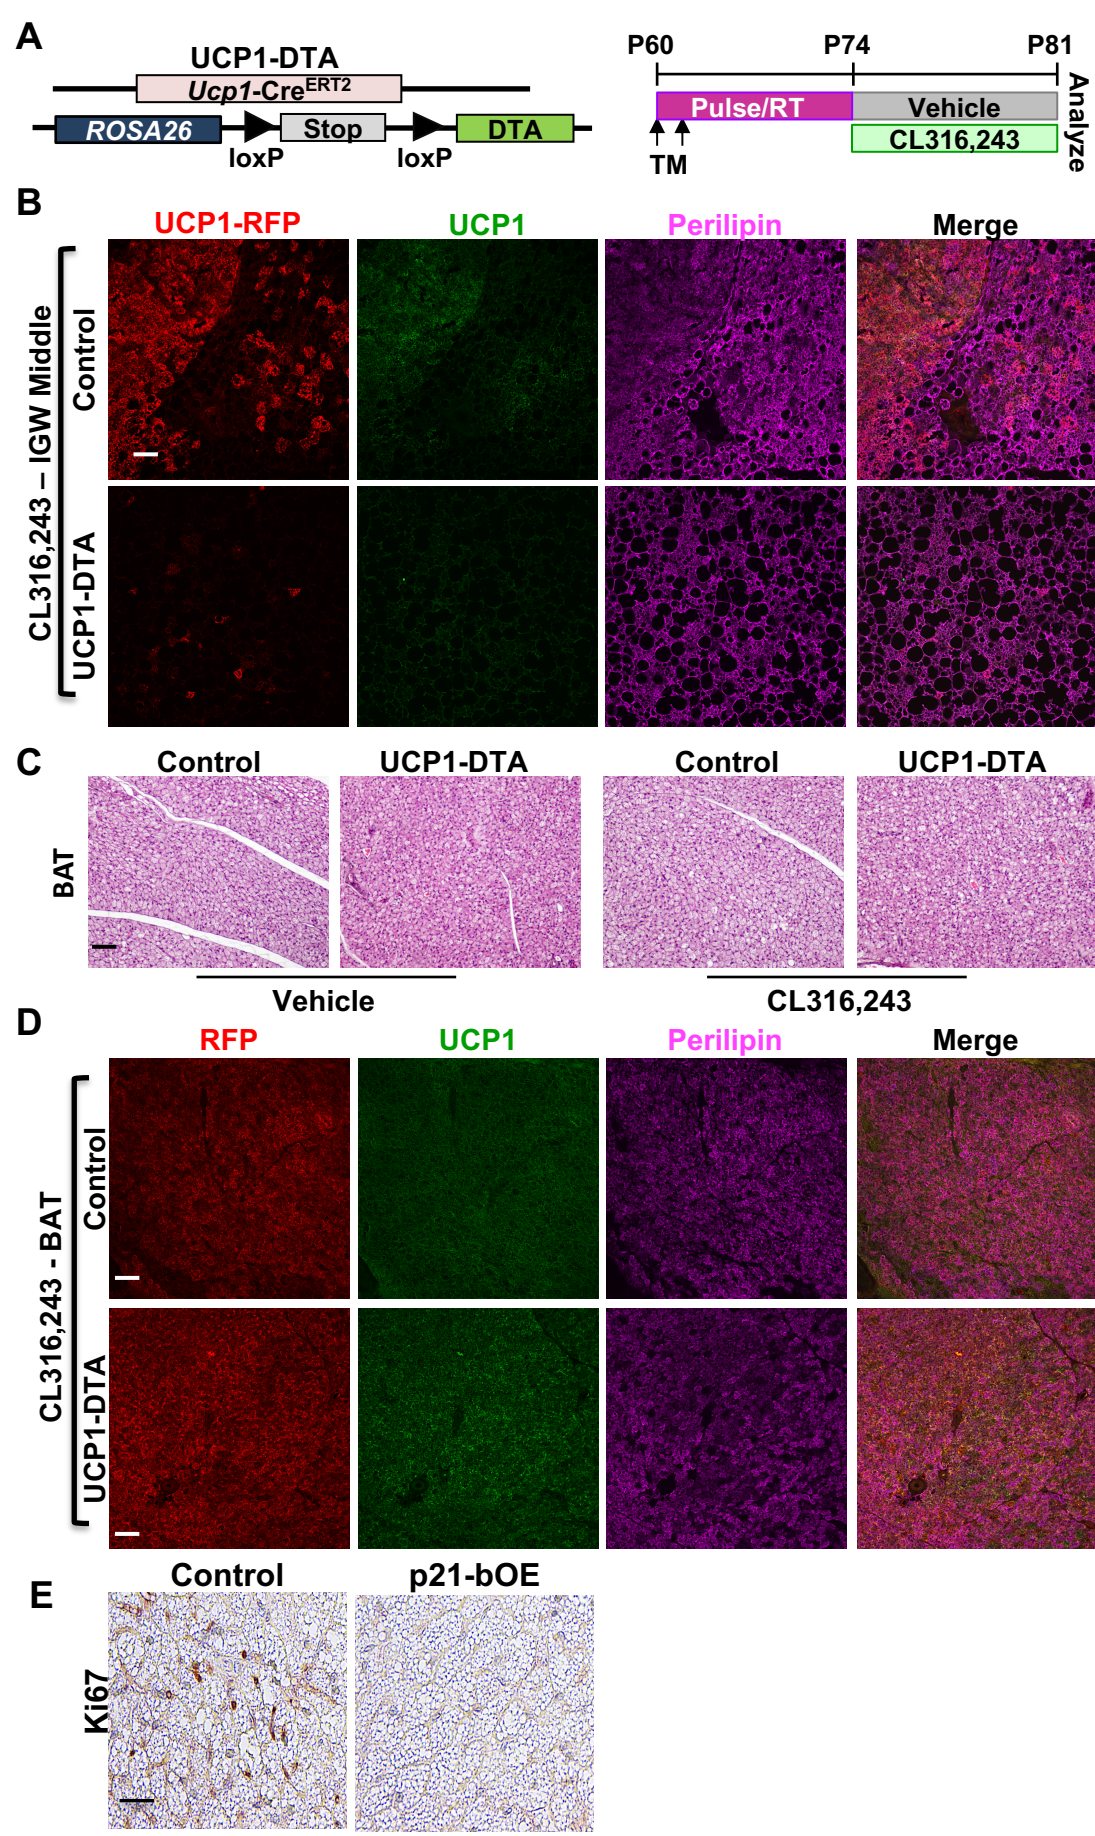

**Figure S4. Ablation of UCP1+ cells reduces beige formation, Related to Figure 3.**

- (A) Experimental scheme. TM-induced 2-month-old male UCP1-DTA mice were treated with vehicle or CL316,243 ( $\beta$ 3 agonist) (n=5 mice per group).
- (B) Representative fluorescence imaging of UCP1-RFP (red), UCP1 (green), and Perilipin (Magenta) immunostaining on IGW sections. Scale = 100  $\mu$ m.
- (C) Representative H&E staining on BAT sections. Scale = 100  $\mu$ m.
- (D) Representative immunostaining images for UCP1-RFP (red), UCP1 (green), and Perilipin (magenta) and on BAT sections. Scale = 100  $\mu$ m.
- (E) Representative images for Ki67 staining on control or p21-bOE depots . Scale = 200  $\mu$ m.



**Fig S5.**

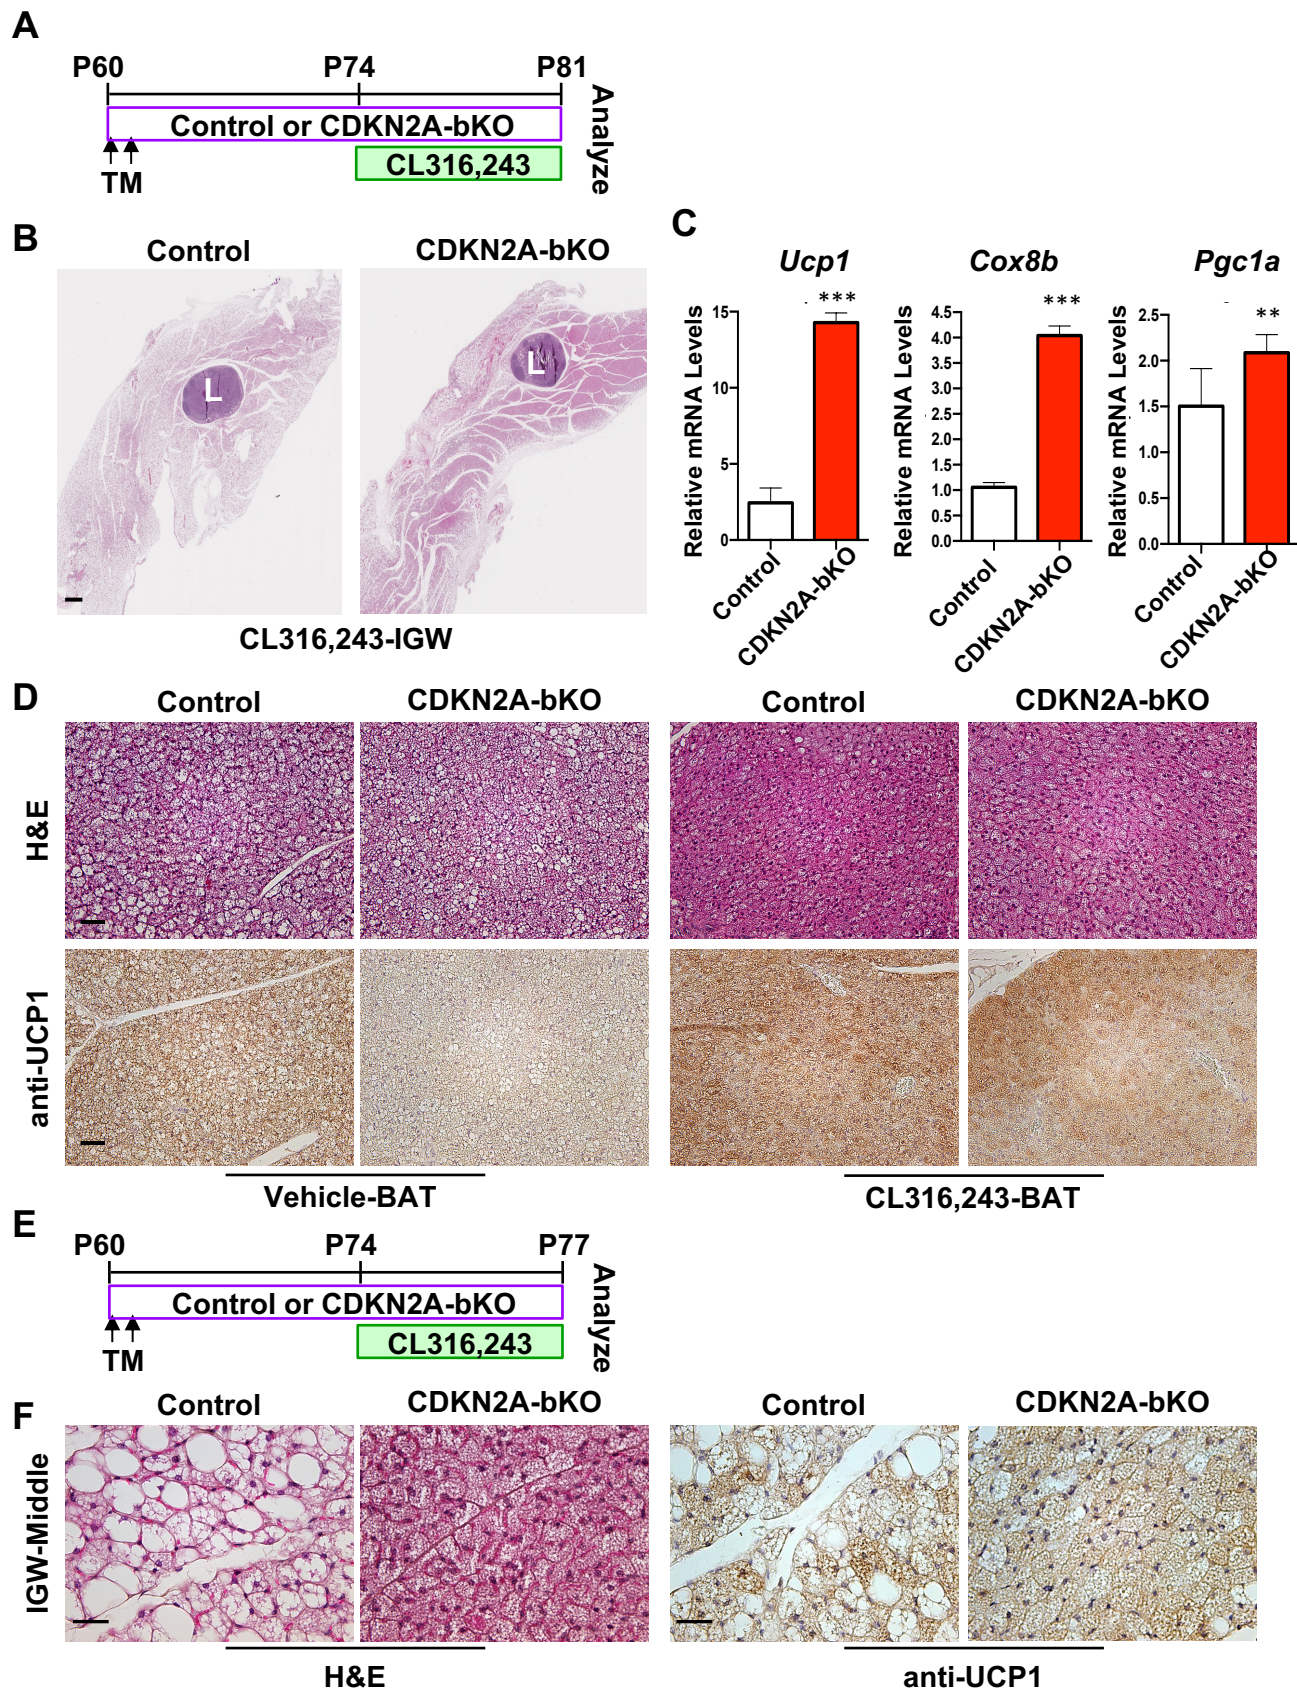

**Figure S5. Loss of CDKN2A in UCP1+ cells promotes beige adipocyte formation but does not affect brown adipocytes, Related to Figure 5.**

(A) Experimental scheme. TM-induced 2-month-old control or Cdkn2a-bKO mice were administered CL316,243 for 7 consecutive days (n=6 mice per group)

(B) Representative H&E staining on IGW sections. Scale = 0.5mm

(C) Thermogenic gene expression in IGW. Data are expressed as means  $\pm$  SEM. \*\*P<0.001, \*\*\*P<0.0001

(D) Representative H&E staining and IHC for UCP1 on BAT sections. Scale = 200  $\mu$ m.

(E) Experimental scheme. TM-induced 2-month-old control or Cdkn2a-bKO mice were administered CL316,243 for 3 consecutive days. (n=3 mice per group)

(F) Representative H&E staining and IHC for UCP1 on IGW sections. Scale = 200  $\mu$ m.

**Fig S6.**

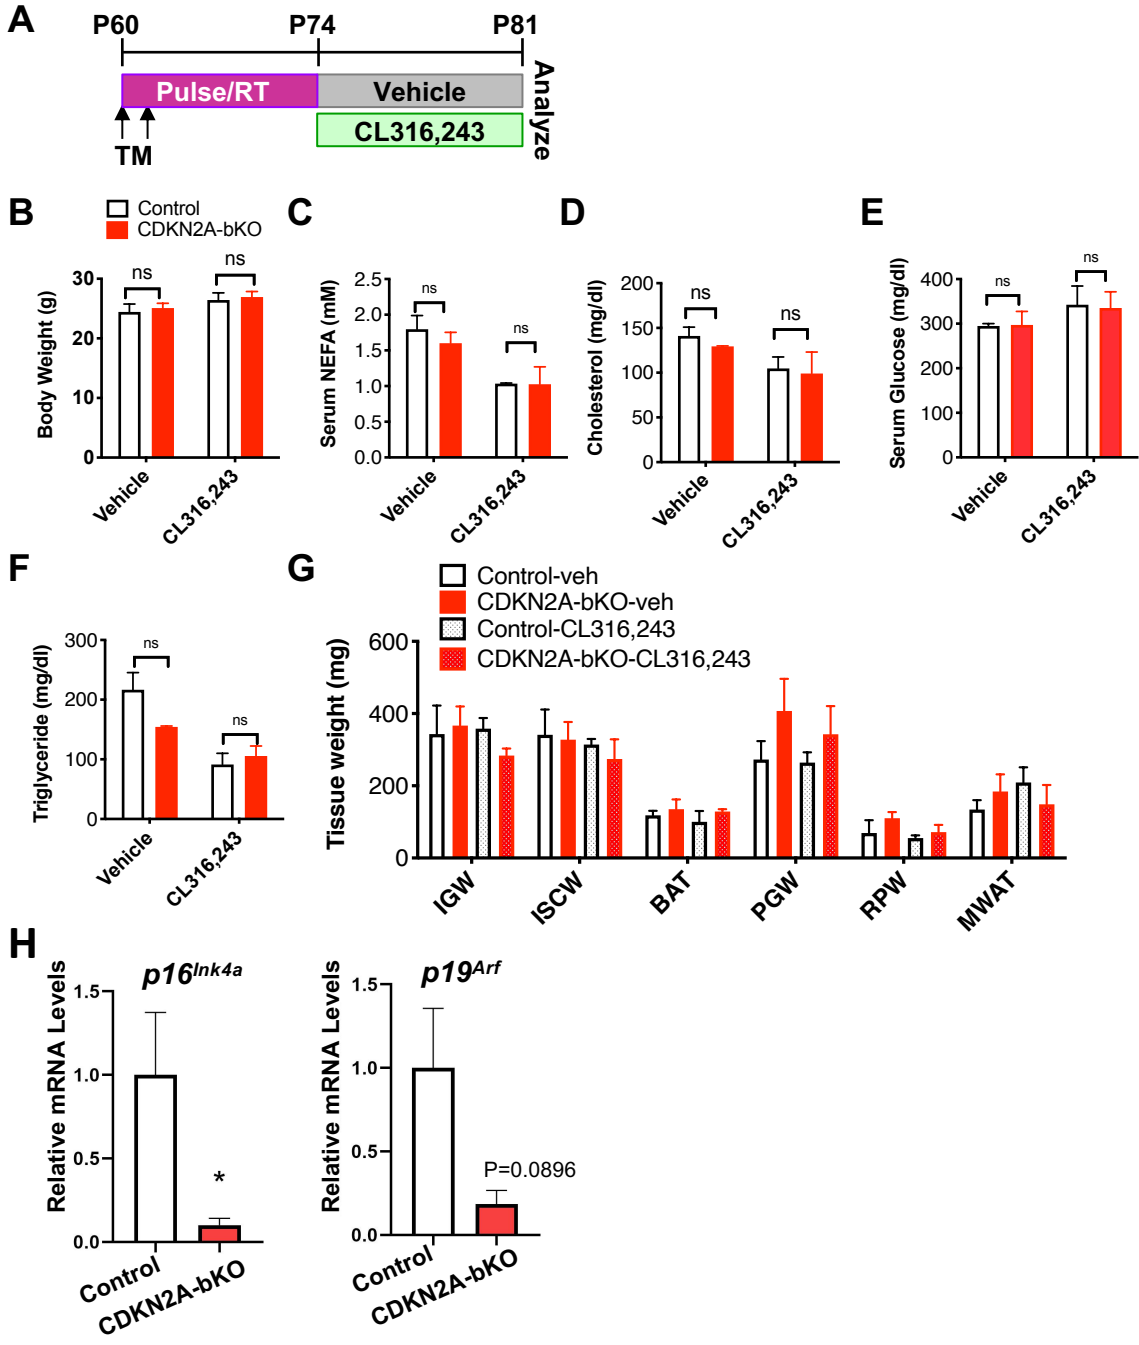

**Figure S6. Short-term loss of CDKN2A in UCP1+ cells does not display metabolic phenotypes, Related to Figure 5.**

(A) Experimental scheme. TM-induced 2-month-old control or *Cdkn2a*-bKO mice were administered vehicle or CL316,243 for 7 consecutive days (n=6 mice per group).

(B) Body weights of control and CDKN2A-bKO mice after vehicle or CL316,243 treatment. Data are expressed as means  $\pm$  SEM (n=4 mice per group).

**(C-F)** Serum NEFA (C), Cholesterol (D), Glucose (E), and Triglyceride (F) levels of vehicle or CL316,243-treated control and CDKN2A-bKO mice. Data are expressed as means  $\pm$  SEM (n=4 mice per group).

(G) Tissue weights of vehicle or CL316,243-treated control and CDKN2A-bKO mice (n=4 mice per group). Data are expressed as means  $\pm$  SEM. PGW, Perigonadal WAT; RPW, Retroperitoneal WAT; MWAT, Mesenteric WAT.

(H) *Cdkn2a* gene expression in control and CDKN2A-bKO IGW depots (n=4 mice per group). Data are expressed as means  $\pm$  SEM. \*P<0.01.

**Fig S7.**

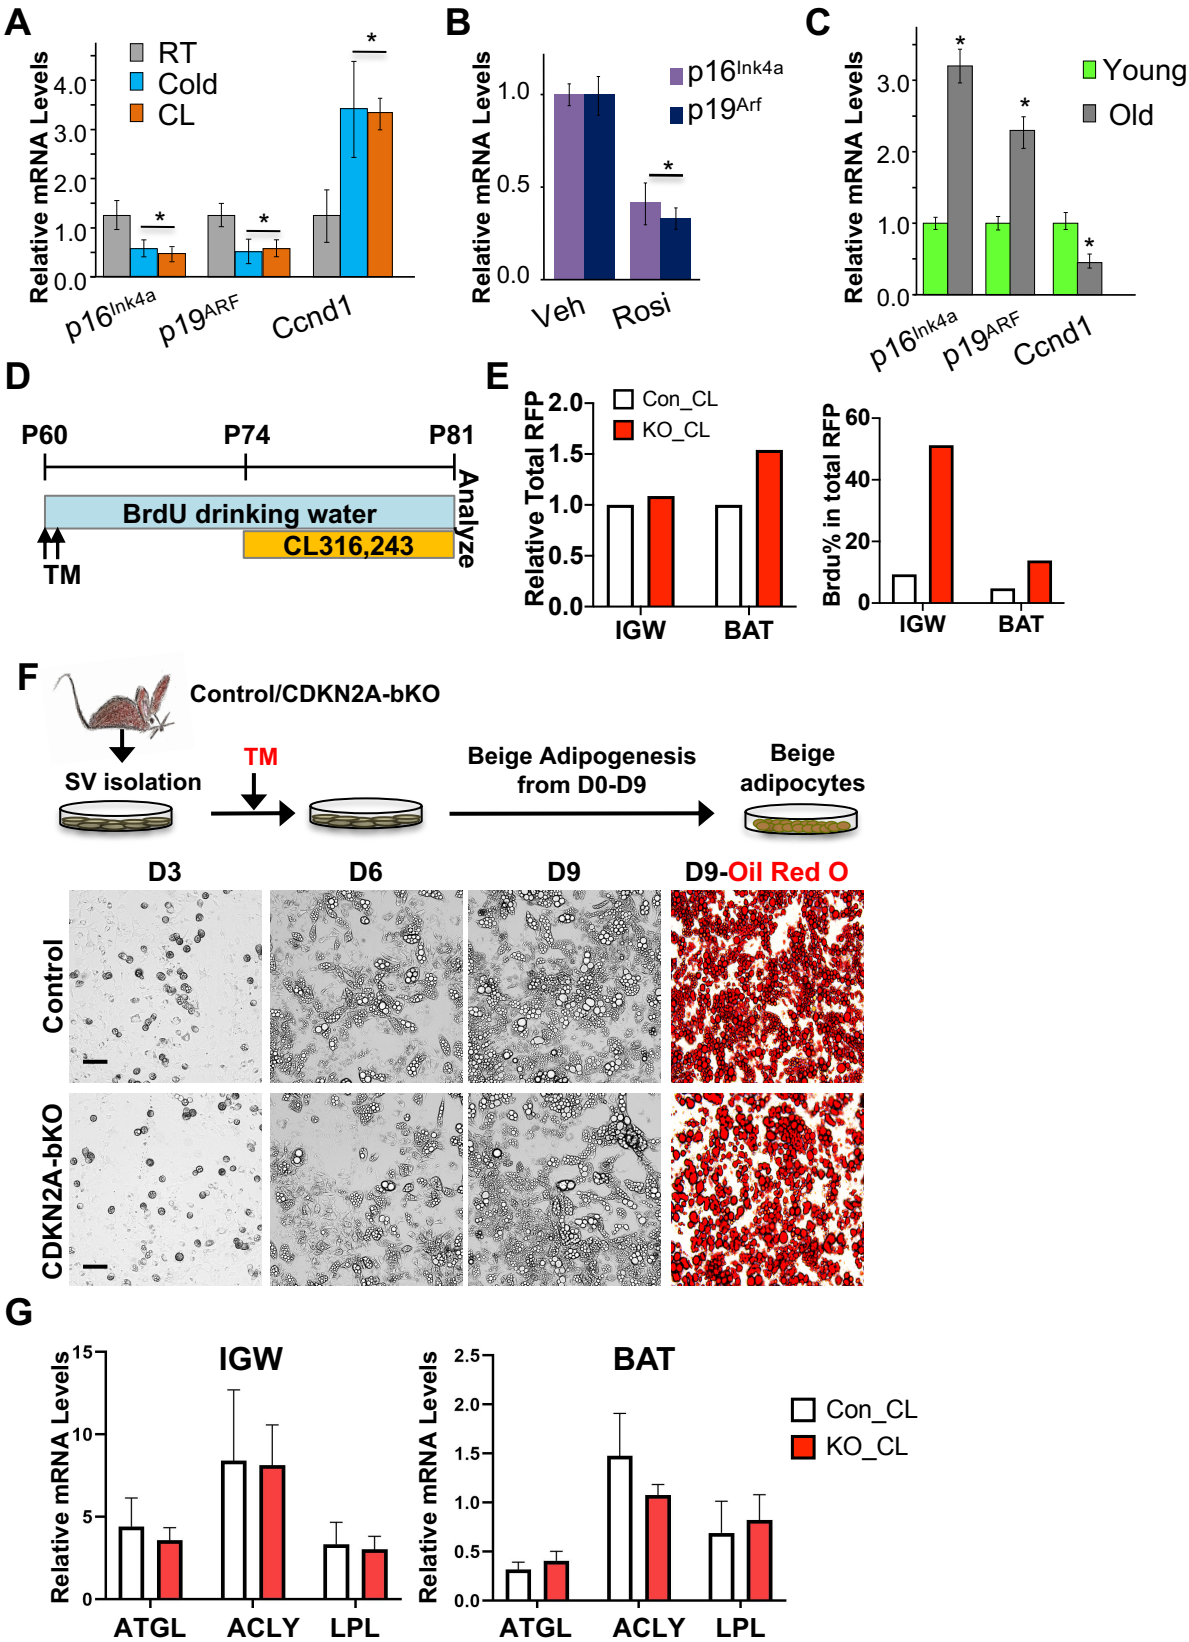

**Figure S7. An inverse correlation between p16<sup>Ink4a</sup> and p14<sup>ARF</sup> expressions in iWAT and beige activity, Related to Figure 6.**

(A-C) qPCR analysis of cell cycle gene expression in IGW depots with 7 days of cold or CL treatment (A), with rosiglitazone (Rosi) treatment (B), and of young and old mice (C). Data are expressed as means  $\pm$  SEM. \*P<0.01. (n=4-5 mice per group). Young: 2-month-old; Old: 6-month-old.

(D) Experimental scheme. TM-induced 2-month-old control or CDKN2A-bKO mice were given BrdU containing drinking water for 3 weeks and treated with CL for 7 days.

(E) Quantification BrdU and RFP flow analysis of IGW and BAT from control or CDKN2A-bKO mice (mixed samples from n=3 male mice per group).

(F) Experimental scheme to treat SV cells with 4-OHT and then induce beige adipogenesis. DIC imaging at day 3 (D3), D6, and D9; and Oil Red O staining on D9 from control and mutants; Scale = 100  $\mu$ m. n=4 mice per group.

(G) Lipolysis- and lipogenesis-related gene expression in IGW and BAT. ATGL, adipose triglyceride lipase; ACLY: ATP citrate lyase; LPL: lipoprotein lipase. Data are expressed as means  $\pm$  SEM.

**Table S1, Related to STAR Methods.**

Primer sequences used for qRT-PCR.

| Gene                       | Forward                | Reverse                    |
|----------------------------|------------------------|----------------------------|
| <i>Ucp1</i>                | CACCTTCCCGCTGGACACT    | CCCTAGGACACCTTTATACCTAATGG |
| <i>Pgc1a</i>               | CCGATCACCATATTCCAGGT   | GTGTGCGGTGTCTGTAGTGG       |
| <i>Cox8b</i>               | GAACCATGAAGCCAACGACT   | GCGAAGTTCACAGTGGTTCC       |
| <i>Irf4</i>                | CAGGACTACAATCGTGAGGAGG | GCACATCGTAATCTTGTCTTCCA    |
| <i>Cidea</i>               | TGACATTCATGGGATTGCAGAC | GGCCAGTTGTGATGACTAAGAC     |
| <i>Tbx1</i>                | CTGTGGGACGAGTTCAATCAG  | TTGTCATCTACGGGCACAAAG      |
| <i>ATGL</i>                | AACACCAGCATCCAGTTCAA   | GGTTCAGTAGGCCATTCTC        |
| <i>Acly</i>                | ACCCTTTCCTGGGGATCACA   | GACAGGGATCAGGTATTCCTTG     |
| <i>LPL</i>                 | GGCCAGATTCATCAACTGGAT  | GCTCCAAGGCTGTACCCTAAG      |
| <i>P21</i>                 | GTAATTCCTCTGCCCTGCTG   | TCTGCGCTTGGAGTGATAGA       |
| <i>Ccnd1</i>               | ACTGACAACCTATCCGGCC    | GTCTGCTTGTTCTCATCCGC       |
| <i>p19<sup>ARF</sup></i>   | GCAGGTTCTTGGTCACTGT    | TCGCACGAACTTCACC           |
| <i>p16<sup>Ink4a</sup></i> | CGAACTCTTTCGGTTCGTAC   | ATCATCATCACCTGAATCGGGGT    |
| <i>Rn18S</i>               | GTAACCCGTTGAACCCCAT    | CCATCCAATCGGTAGTAGCG       |
